# Supplementary material
Source: PubMed Central journal article supplement (PMC2878871)
Supplement: NIHMS192101-supplement-05.pdf [file NIHMS192101-supplement-05.pdf]

### Supplemental Figure Legends

**Supplemental Fig. 1.** Phospholipase C causes Plg to lose T15 immunoreactivity. Immunoblot of a non-reduced 4-20% SDS-PAGE of Glu-Plg and NH<sub>2</sub>-K1-4 blot probed with T15 antibody. Digestions with and without enzyme were performed at 37°C for 4 h in the presence of 5 mM Ca<sup>++</sup>. PLC, phospholipase C; (+), with enzyme; (-), without enzyme.

**Supplemental Fig. 2.** ESI/MS/MS of peptide-POVPC complex after incubation with Lp-PLA<sub>2</sub>. The pentapeptide-POVPC complex was incubated with LpPLA<sub>2</sub> overnight and the products were lyophilized and dissolved in chloroform. An aliquot was combined with chloroform/methanol/300 mM ammonium acetate in water (300/665/35) and introduced into the ESI source by continuous infusion. As indicated the most prominent peak was lysoPtdPC (m/z 496.6).

**Supplemental Fig. 3.** ESI/MS/MS of a16:0 lysoPtdPC standard and Glu-Plg before and after Lp-PLA<sub>2</sub> digestion. A, 5.56 nmol of a16:0 lysoPtdPC standard were analyzed. The position of the peak is marked. B, Glu-Plg (300µg or 3.4 nmol) before digestion was lyophilized, and extracted as described for supplemental Fig. 2. The total extract was analyzed. An internal standard 13:0 lysoPtdPC, 454.5 m/z (0.3 nmol) was incorporated with the sample during the lyophilization and extraction procedure. The sensitivity was increased 20 fold in the 460 – 535 m/z range. C, Glu-Plg ( 23 µg or 0.26 nmol), after digestion, was treated as in B. A major peak was observed at 496.6 m/z (16:0 lysoPtdPC) along with small ones at 524.4, 522.4 and 520.3 m/z corresponding to 18:0, 18:1 and 18:2 lysoPtdPC, respectively. The sensitivity was increased 20 fold in the 460 – 535 m/z range.

**Supplemental Fig. 4.** Dephosphorylation does not affect T15 reactivity. Immunoblot analysis of Glu-Plg probed with anti-phosphoserine (anti P-Ser) and T15 antibodies. Glu-Plg was incubated at 37°C

overnight with alkaline phosphatase in 25 mM  $\text{NH}_4\text{HCO}_3$ , pH7.9. Aliquots were then removed and analyzed on immunoblots of non-reduced 4-12% SDS-PAGE. (-), without enzyme; (+), with enzyme.
